**Title: Linking structural and functional changes during aging using multilayer brain network analysis**

**Authors:** Gwendolyn Jauny (1), Mite Mijalkov (2), Anna Canal-Garcia (2), Giovanni Volpe (3), Joana Pereira (2, 4), Francis Eustache (1), Thomas Hinault (1)\*

(1) Normandie Univ, UNICAEN, PSL Université Paris, EPHE, Inserm, U1077, CHU de Caen, Centre Cyceron, Neuropsychologie et Imagerie de la Mémoire Humaine, 14000 Caen, France

(2) Department of Neurobiology, Care Sciences and Society, Karolinska Institutet, Stockholm, Sweden

(3) Department of Physics, Goteborg University, Goteborg, Sweden

(4) Clinical Memory Research Unit, Department of Clinical Sciences, Lund University, Malmö, Sweden

\*Corresponding author:

Thomas Hinault

INSERM-EPHE-UNICAEN U1077, 2 rue des Rochambelles, 14032 Caen, FRANCE.

Email: [thomas.hinault@inserm.fr](mailto:thomas.hinault@inserm.fr)

**Declarations of interest:** none

**Abstract:**

Brain structure and function are intimately linked, however this association remains poorly understood of the complexity of this relationship has remained understudied. Healthy aging is characterized by heterogenous levels of structural integrity changes that influence functional network dynamics. Here, we used the multilayer brain network analysis on structural (diffusion tensor imaging) and functional (magnetoencephalography) data from the Cam-CAN database. We found that the level of similarity of connectivity patterns between brain structure and function in the parietal and temporal regions (alpha frequency band) was associated with cognitive performance in healthy older individuals. These results highlight the impact of structural connectivity changes on the reorganisation of functional connectivity associated with the preservation of cognitive function, and provide a mechanistic understanding of the concepts of brain maintenance and compensation with aging. Investigation of the link between structure and function could thus represent a new marker of individual variability, and of pathological changes.

**Keywords:** Multilayer network analysis; MEG; DTI; Connectivity; Healthy aging; Cognitive variability

## 1 Introduction

2 The brain is one of the most complex biological systems. One of its fascinating aspects, which  
3 remains largely unknown, is how wide varieties of brain rhythms and temporally-specific  
4 activity patterns<sup>1</sup> can emerge from a static network architecture<sup>2</sup>. Addressing this issue is a  
5 major fundamental endeavor for cognitive neuroscience, which can also improve our  
6 understanding of brain changes across the lifespan, and our ability of detecting pathological  
7 processes. Previous work has mostly focused on characterizing brain structure (i.e., grey matter  
8 and white matter), or brain function (i.e., memory, motor function or cognitive control). These  
9 unimodal studies greatly advanced our understating of brain networks and of their associations  
10 with cognition<sup>3</sup>. However, brain network analysis methods, such as graph theory, have more  
11 recently been applied across modalities to study the interaction between structure and function,  
12 showing strong associations between these dimensions<sup>4,5</sup>. Since these seminal studies, the  
13 relationship between brain structure and function has been the focus of intense reflection and  
14 methodological development, since this relationship is central to many cognitive domains,  
15 evolves with age and is affected by pathologies<sup>4</sup>. Here, we investigate these issues in light of  
16 age-related brain changes, associated with changes of brain structure that influence neural  
17 dynamics<sup>6</sup>, which could further our understanding of the large heterogeneity of individual  
18 cognitive trajectories observed during this life period. In particular, structure-function  
19 interactions could be central to further understand the preservation (i.e. maintenance<sup>7</sup> or  
20 compensation<sup>8</sup>) or the decline of cognitive performance during aging.

21 Studying the relationships between white matter fibers (acquired by DTI -diffusion tensor  
22 imaging) and Blood-Oxygen-Level-Dependent (BOLD) signal (acquired by fMRI -functional  
23 magnetic resonance imaging), previous studies have shown correlations between brain structure  
24 and function throughout the lifespan, and particularly across development<sup>9,10</sup>, and during the  
25 performance of cognitive tasks<sup>11</sup>. Also, in a healthy older population, Burzynska *et al.*<sup>12</sup> showed  
26 that individuals with preserved white matter fiber integrity had a higher BOLD signal associated  
27 with better cognitive performance (see also<sup>13,14</sup>). Many studies have thus focused on this link  
28 between structure and function using high-spatial-resolution techniques such as fMRI.  
29 However, due to their constrained temporal resolution, age-related changes in the dynamics of  
30 the involved networks remain largely understudied.

31 Previous work has also demonstrated interactions between brain structure and function using  
32 high temporal resolution techniques, such as magnetoencephalography (MEG) or  
33 electroencephalography (EEG). Indeed, fluctuations in the synchrony and directionality of  
34 brain activity have long been considered as noise to be controlled, whereas today they have  
35 been reappraised as a fundamental aspect of brain communication<sup>15,16</sup>. These studies have  
36 notably highlighted that EEG connectivity is associated with structural connectivity measures  
37 in young adults<sup>17</sup>. With healthy aging, Hinault *et al.*<sup>18,19</sup>, showed that a decrease in white matter  
38 fiber integrity negatively impacts the neural synchronization between brain regions. However,  
39 for all these studies, the interpretation of these interactions is limited as it is based on  
40 correlational evidence, which does not account for the full complexity of such a relationship.

41 A recent approach enables evaluating the relationships between different neuroimaging  
42 modalities by constructing a multiplex network model of the brain<sup>20</sup>. This approach allows the  
43 creation of a network in which each region is connected to itself across different layers<sup>21</sup>. This  
44 technique has already been used in pathology, such as schizophrenia<sup>22</sup> and Alzheimer's

45 disease,<sup>23,24</sup> allowing to highlight brain changes that were not detected in unimodal analyses.  
46 Recently, the study by Battiston *et al.*<sup>25</sup>, investigating network connectivity by combining fMRI  
47 and DTI data in a two-layer multiplex network revealed relevant relationships between  
48 structural and functional brain networks, showing that this technique is an appropriate choice  
49 for the study of brain network connectivity. Thus, multiplex brain networks can be used to study  
50 the structure-function relationship in healthy aging. To our knowledge, no study has  
51 investigated the changes of structural and functional connectivity with increasing age using a  
52 multiplex approach applied on DTI and MEG (or EEG) data. However, previous work<sup>26</sup>  
53 suggested that alterations in brain structure can lead to delayed and/or noisier brain  
54 communications. Such combination of DTI (structural) and MEG (functional) data in a  
55 multiplex connectome in healthy aging is therefore important to identify markers of individual  
56 differences and early brain aging effects, preceding major structural changes and loss of  
57 functional communications. These changes can lead to deleterious functional consequences<sup>19,27</sup>  
58 or compensatory functional adjustments<sup>28</sup>. This method therefore appears ideal to clarify the  
59 association between brain structure and cortical dynamics, to identify the mechanisms  
60 underlying cognitive heterogeneity with aging, and the functional adjustments allowing the  
61 maintenance of cognitive function.

62 Here, we propose a multiplex network approach with MEG and DTI data in the context of  
63 healthy aging and the associated non-lesional brain changes<sup>29</sup> (see **Figure 1**). We used the  
64 multiplex participation coefficient as an indicator of similarity of connectivity between brain  
65 structure and function: a high level of this coefficient corresponded to a similarity of  
66 connectivity patterns between these modalities whereas a low level corresponded to a  
67 divergence of connectivity patterns between these modalities. We investigated changes in brain  
68 structure and function over time in young and older healthy participants from the Cam-CAN  
69 database (Cambridge Center for Aging and Neuroscience<sup>30,31</sup>). This database includes  
70 multimodal neuroimaging data (MEG, MRI, DTI) as well as cognitive performance evaluation  
71 for each individual. Our objectives were two-fold: i) To investigate changes in the interaction  
72 between structural integrity levels and synchronized functional networks between young and  
73 old individuals, with the underlying hypothesis that a decrease in white matter integrity could  
74 negatively impact brain function.. ii) To study the impact of such structure-function relationship  
75 on participants' cognitive performance, where we expected that these changes would be  
76 associated with cognitive performance and reveal unique individual differences therein.  
77 Compensatory adjustments or maintenance of brain function at the same level as young adults  
78 would result in preservation of cognitive performance. Such results could clarify and better  
79 characterize maladaptive and compensatory brain communication changes in the presence of  
80 aging structural networks.

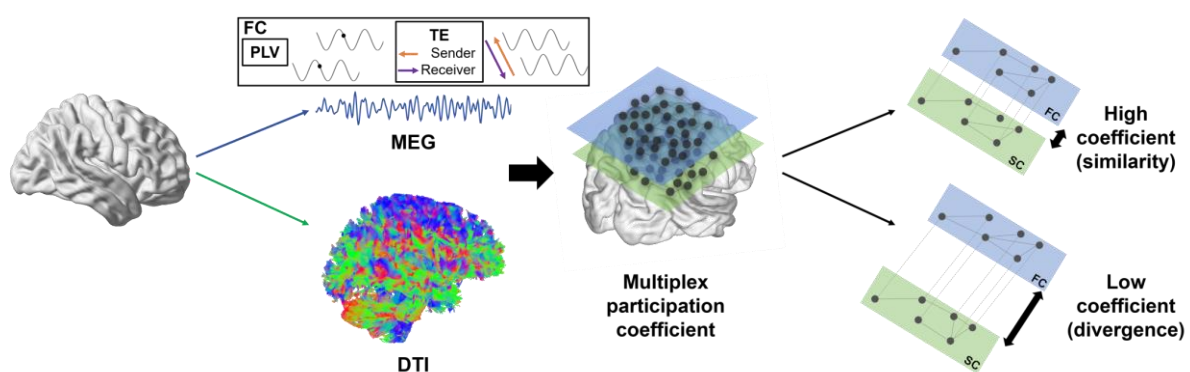

**Figure 1.** Overview of the creation of the multiplex network from MEG and DTI data. This multiplex network was built with two layers: one representing functional connectivity (FC) from MEG data, either PLV or TE data; the other layer representing structural connectivity (SC) from DTI (anisotropic fraction) data, i.e. FA data. MEG: Magnetoencephalography, DTI: Diffusion Tensor Imaging, PLV: Phase Locking Value, TE: Transfer Entropy, FC: Functional Connectivity, SC: Structural Connectivity

## 81 **Results**

82 Two groups of participants (20-30 years for the younger group and 60-70 years for the older  
83 group) were formed from the Cam-CAN<sup>30,31</sup> database. Connectivity analyses were performed  
84 on MEG data, and in particular, two measures were studied: phase locking value (PLV), which  
85 measure synchrony between regions, and transfer entropy (TE), which measure the  
86 directionality of the coupling between brain regions. The data from these two measures were  
87 combined with DTI data to form two multiplex structure-function networks (see **Figure 1**).  
88 From these networks, the multiplex participation coefficient could be calculated. This  
89 coefficient was then studied to determine the level of similarity of connectivity between the two  
90 layers (structural and functional) of the network. The different phases of data processing,  
91 creation of multiplex networks and statistical analysis are described in the materials and  
92 methods section.

### 93 **Multiplex network: PLV/DTI**

#### 94 **Positive association between multiplex participation coefficients and cognitive** 95 **performance in older adults**

96 Our main objective was to study the effect of healthy aging on structural and functional  
97 connectivity, and its association with cognitive abilities (measured with neuropsychological  
98 tests assessing working and short-term memory, reasoning ability, executive functions and  
99 general cognitive functions, see materials and methods for more information). Thus, we  
100 determined which region and which frequency bands age-related changes in multiplex  
101 participation coefficient could be associated with cognitive performance. First, we identified  
102 the regions and frequency bands that differed between age groups and were associated with  
103 cognition: the left temporal and right parietal regions in the alpha frequency band (these two  
104 regions showing, respectively, a decrease or an increase in participation in the older individuals  
105 compared to the younger). For other regions and frequency bands showing differences not  
106 associated with cognitive performance, see **Figure 1s** in supplementary. We found that, for both  
107 of these regions, increased multiplex participation coefficient levels were positively associated  
108 with cognitive performance in older adults (left temporal/MMSE test,  $r= 0.313$ ,  $p= 0.034$ ; right  
109 parietal/MMSE test,  $r= 0.393$ ,  $p= 0.007$ ; **Figure 2**). No association was found in young adults.

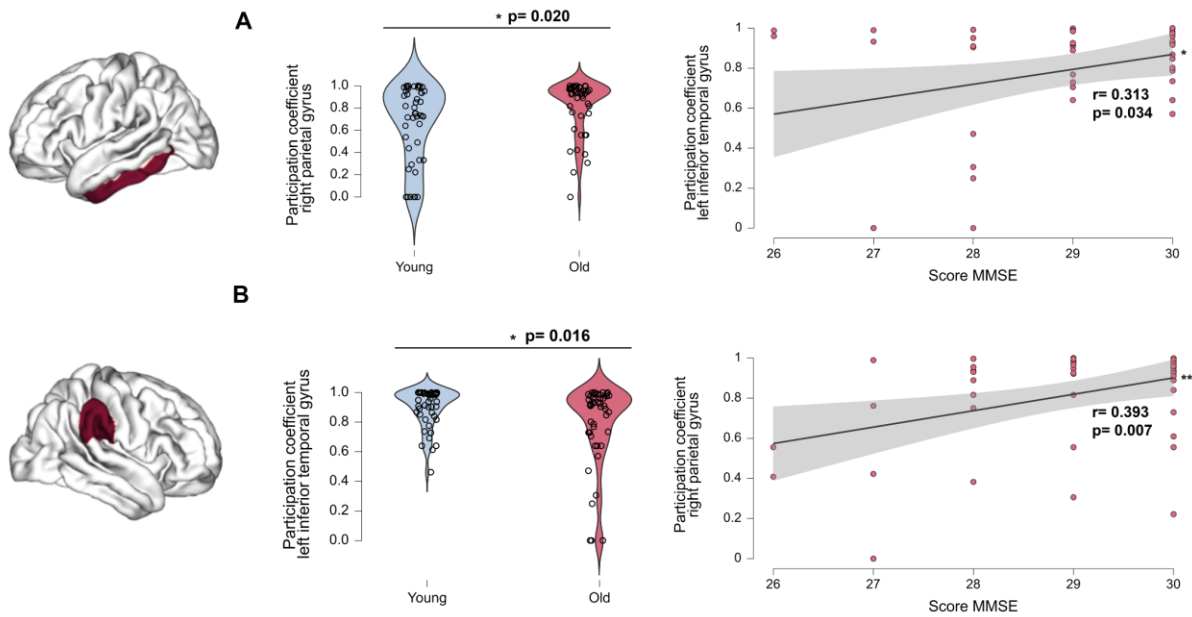

**Figure 2.** (A) Distribution of the young and old groups in left inferior temporal region (t-test) for the multiplex participation coefficient in alpha frequency band for the measure of synchrony (PLV) and positive association between this level of multiplex participation coefficient and MMSE score. (B) Distribution of the young and old groups in right parietal region (t-test) for the multiplex participation coefficient in alpha frequency band for the measure of synchrony (PLV) and positive association between this level of multiplex participation coefficient and MMSE score, in older adults. \* $p < 0.05$  \*\* $p < 0.01$

110 **Maintaining a lower level of multiplex participation coefficient than younger adults is**  
 111 **positive for the older population**

112 To further analyze these results, subgroup analyses were performed for these two regions. To  
 113 do this, participants were grouped according to the level of participation coefficient in each  
 114 region, forming two groups of older individuals. The older subgroups (i.e., Low participation,  
 115 High participation; see **Table 1s** to **Table 4s** in supplementary data for the characteristics of  
 116 each subgroup) did not differ on any measure (e.g., age, gender ratio, level of education, general  
 117 cognitive performance) other than the level of multiplex participation coefficient (left temporal  
 118 and right parietal regions). For the left temporal region, young adults differ from both older  
 119 subgroups, and both subgroups also significantly differ from each other: the level of the  
 120 participation coefficient was significantly higher for the High participation subgroup than the  
 121 younger group ( $p=0.009$ ). The Low participation subgroup showed lower multiplex  
 122 participation levels than both younger individuals and the High participation subgroup ( $p < 0.001$   
 123 for both comparison). The Low participation subgroup showed better cognitive performance on  
 124 the VSTM test than the High participation subgroup ( $r=0.584$ ,  $p=0.009$ ; **Figure 3A**).

125  
 126 For the right parietal region, young adults differ from the High participation subgroup, but not  
 127 with the Low participation subgroup. We observed that the Low participation subgroup (with  
 128 similar low participation as younger individuals,  $p=0.962$ ) showed better cognitive performance

129 on the VSTM test ( $r=0.475$ ,  $p=0.040$ ; no association with cognition for the high participation  
 130 older subgroup; **Figure 3B**).

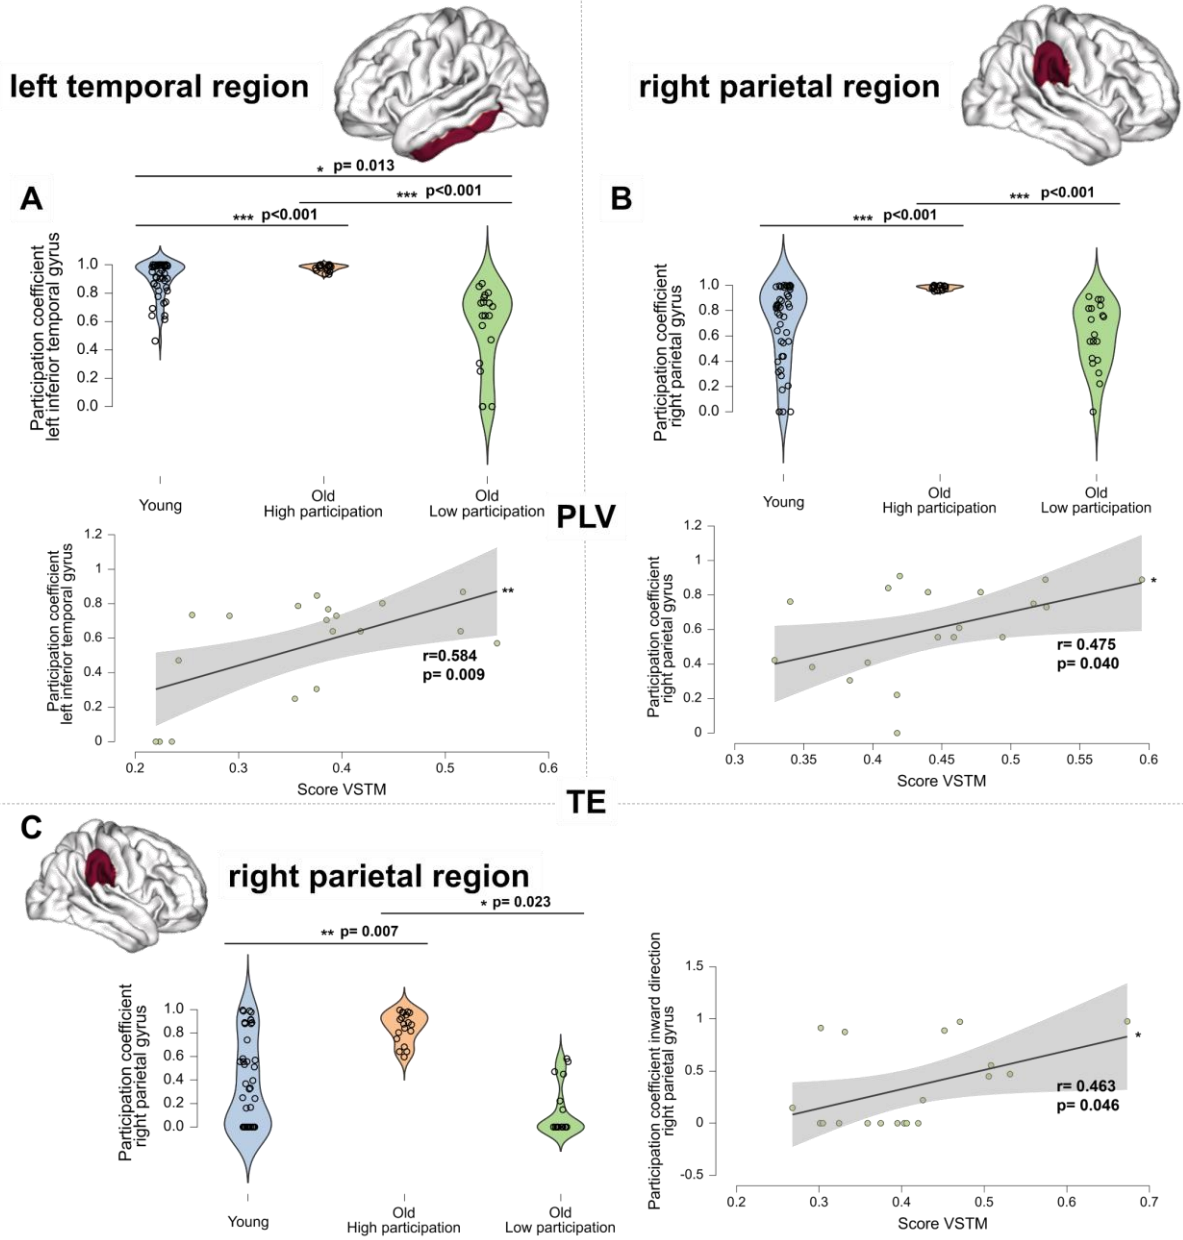

**Figure 3.** (A) Distribution of young adults and older adults' subgroups for the multiplex participation coefficient in the left temporal region for the measure of synchrony (PLV) in the alpha frequency band. Positive association between participation in the left temporal region and VSTM scores for the Low participation subgroup (regression test; no association with cognition for the High participation older subgroup). (B) Distribution of the young adults and older adults' subgroups for the multiplex participation coefficient in the right parietal region in alpha frequency band. Positive association between participation in the right parietal region and VSTM scores for the Low participation older subgroup (regression test; no association with cognition for the high participation older subgroup). (C) Distribution of young adults and older adults' subgroups for the multiplex participation coefficient in the right parietal region in alpha frequency band for the measure of directionality (TE). Positive association between the participation of the right parietal region and VSTM scores for the Low participation subgroup (regression test; negative association with cognition for the High participation older subgroup:  $r = -0.491$ ,  $p = 0.033$ ). All results were adjusted for multiple comparisons using FDR corrections at  $q < 0.05$ .  
\* $p < 0.05$ ; \*\* $p < 0.01$ ; \*\*\* $p < 0.001$

131 **Multiplex network TE/DTI**

132 **Age-related changes in network couplings directionality are positively associated with**  
133 **cognitive performance**

134 Following these results, we examined aging effects and individual differences in these regions  
135 using directed functional couplings. For the right parietal region only, in the alpha band, we  
136 observed an increase in inward directionality (i.e., directed towards the right parietal region) in  
137 older individuals compared to younger individuals (t-test,  $p = 0.038$ ; **Figure 4A**). See  
138 Supplementary **Figure 2s** for consistent results involving gamma frequency bands. This  
139 increased participation in the inward direction for the right parietal region with aging was  
140 positively associated with performance in the VSTM test ( $r = 0.314$ ,  $p = 0.034$ ; **Figure 4C**).

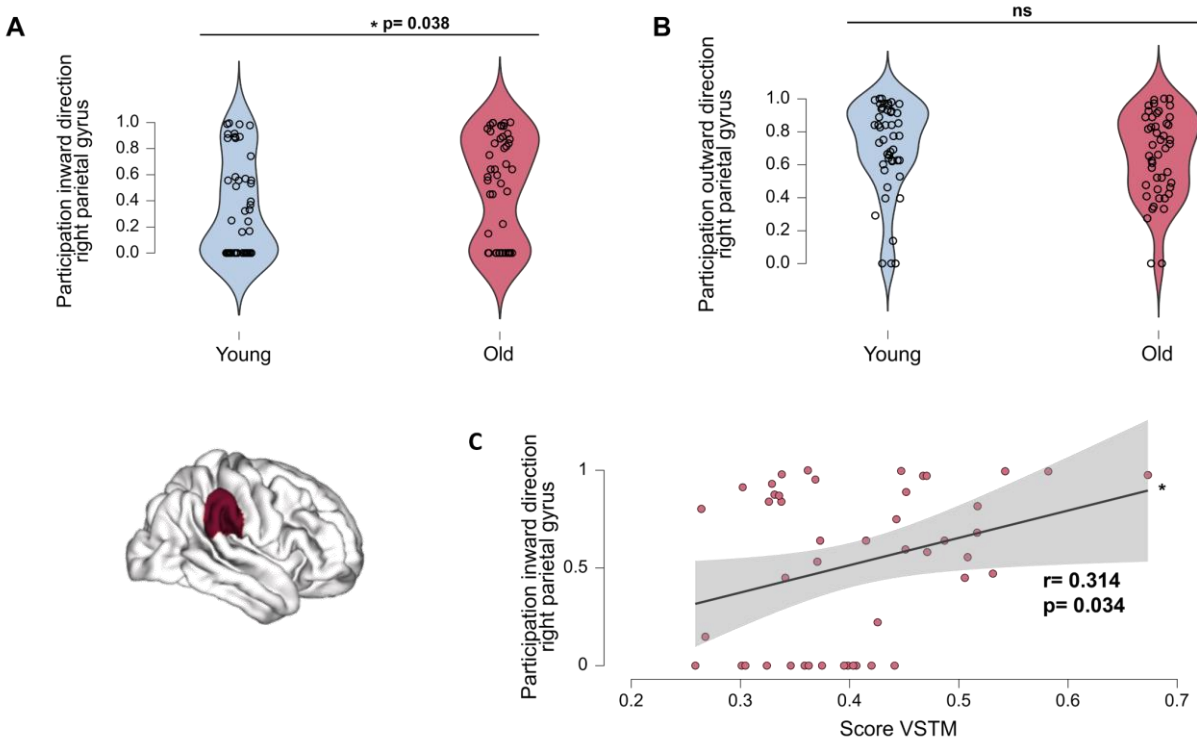



**Figure 4.** (A) Increased inward directionality (i.e., directed towards the right parietal region) in older adults relative to younger adults (t-test) for the right parietal region in alpha frequency band. (B) Preserved outward direction (i.e., directed towards other regions of the network) in older adults relative to the younger group for the right parietal region in the alpha frequency band. (C) Positive association between the increased multiplex participation coefficient in the inward direction for the right parietal region in alpha frequency band and VSTM test scores (regression test) in the older group.  
\* $p < 0.05$

142 To further analyze these results, we investigated differences in the same subgroups as in the  
143 first part (PLV/DTI) of the results.

144 We observed that the Low participation subgroup, showing increased inward-directed  
145 couplings in right parietal region, also showed better cognitive performance on the VSTM test  
146 ( $r = 0.463$ ,  $p = 0.046$ ; **Figure 3C**) than the High participation subgroup. Supporting these results,  
147 the High participation older subgroup showed lower cognitive performance on the VSTM test  
148 ( $r = -0.491$ ,  $p = 0.033$ ; Figure 3s in supplementary data).

#### 149 **Respective contribution of each network layer in younger and older adults**

150 Degree analyses (number of connections) were performed on the respective contribution of  
151 each layer, and suggest that the structural layer makes the largest contribution to the reported  
152 results, as degree was larger in the structural layer (DTI) than in the functional layer (PLV/TE)  
153 for the right parietal region (difference between DTI/PLV and DTI/TE layers,  $p = .001$ ; see  
154 **Figure 3s** in supplementary data). The left temporal region follows this trend as well (difference  
155 between DTI/PLV layers,  $p = 0.086$ ; difference between DTI/TE layers,  $p = 0.001$ ).

156 Interestingly, we examined the contribution of the different layers of connectivity within both  
157 older subgroups compared to the younger group for alpha temporal and parietal functional  
158 activity (see **Figure 4s**). We observed that the older subgroup that showed lower cognitive  
159 performance (High participation) did show difference in contribution between the two  
160 functional layers (differences between PLV and TE,  $p < 0.001$ ), in contrast to the Low older  
161 subgroup that did show better associations with cognitive performance ( $p < 0.05$ ). These results  
162 were found only for the left temporal region.

#### 163 **Unique detection of subgroups relative to unimodal network analyses**

164 Finally, we performed unimodal analyses (DTI, MEG) to determine the added value of  
165 multiplex analyses relative to functional or structural network investigations. Regarding the  
166 structural layer, we replicated the significant difference in white matter integrity between young  
167 and old groups ( $p < 0.001$ ) on global connectivity data. Regarding the functional layer, we did  
168 not find a significant difference between younger and older adults at the global matrix level, in  
169 the alpha frequency band. At the nodal level, no difference between subgroups was observed in  
170 functional or structural networks, in contrast with multilayer analyses.

#### 171 **Discussion**

172 In this study, we have showed the importance of integrating functional and structural  
173 information together to better understand aging effects. Our objectives were two-fold: to  
174 investigate changes of the brain structure-function association with age, and to determine the

175 impact of changes of this association on cognitive performance in older individuals. Our  
176 approach relied on two-layer multiplex network, with a structural layer based on DTI data and  
177 another layer based on resting-state MEG data, to identify changes between younger and older  
178 healthy individuals from the Cam-CAN repository and to further understand maintenance<sup>7</sup> and  
179 compensation<sup>8</sup> phenomena observed in aging. Two aspects of functional network connectivity  
180 were studied: phase synchrony and directed connectivity. We showed the existence of inter-  
181 individual variability at the functional level in older individuals at rest that was associated with  
182 cognitive performance. Low structure/function multiplex participation coefficient for  
183 structure/synchrony and structure/information transfer in temporal and parietal regions in the  
184 alpha frequency band, similar to young adults in parietal region, was associated with preserved  
185 cognitive performance in older individuals. These results highlight the impact of fine structural  
186 alterations on functional connectivity changes with aging, and provide a better understanding  
187 of the relationship between brain structure and function.

188 The multiplex participation coefficient can be considered as an indicator of co-dependence  
189 between modalities: a high level of this coefficient would indicate a high similarity of  
190 connectivity between brain structure and function, whereas a low coefficient would indicate a  
191 dissociation of structure and function connectivity. Subgroup analyses based on this coefficient  
192 allowed the detection of heterogeneity within cognitively healthy older individuals. First, we  
193 showed that lower levels of structure/synchrony participation relative to younger adults might  
194 be beneficial for cognitive performance. Second, using multiplex structure/directed  
195 connectivity network analyses, we showed that low levels of participation in the inward  
196 direction (i.e., corresponding to couplings directed towards a given region), to a similar level  
197 than young adults, for the regions investigated was beneficial for cognitive performance. In  
198 contrast, an increase in this coefficient was found to be negatively associated with cognitive  
199 performance. These subgroups were not found in unimodal analyses.

200 The inferior temporal and supramarginal parietal gyri are both considered to be brain structural  
201 cores<sup>32</sup>. They are also both part of the default mode network<sup>33</sup> (DMN), a network activated at  
202 rest, and whose activity has been associated with memory and executive performance<sup>34</sup>.  
203 Moreover, the alpha frequency band is involved in the structuring of neural rhythms and has  
204 notably been associated with attention allocation and the inhibition of couplings not required  
205 for the task<sup>35,36</sup>. By assessing the interaction between brain structure and the alpha frequency  
206 band, the present results contribute to existing frameworks about this central brain rhythm<sup>35</sup>, as  
207 they did not considered such association. Thus, the disengagement of the DMN, as well as the  
208 posterior alpha reduction, are critical for cognition and are impacted by aging<sup>37,38</sup>. Age-related  
209 structural changes would be central to these changes and would impact brain function. Our  
210 results could indicate that following fine changes in brain architecture, some older individuals  
211 will show a lower level of participation coefficient (i.e., a dissociation of connectivity patterns  
212 between brain structure and function) than others, which may be due to compensatory  
213 functional readjustments involving the alpha frequency band. These changes would enable  
214 better cognitive performance than individuals who will not make these functional  
215 readjustments, with higher levels of participation coefficient (i.e., a stronger association of  
216 connectivity patterns between brain structure and function). Future, longitudinal investigations  
217 remain important to further clarify this association.

218 Our results also reveal that the subgroup of older individuals who showed lower  
219 structure/function multiplex participation coefficient, and for whom these changes were

220 positively associated with cognitive performances, showed no difference in contribution  
221 (calculated by measuring connectivity levels in each layer) between the phase synchrony (PLV)  
222 and information transfer (TE) layers. Conversely, an increase in the contribution of the phase  
223 synchrony layer compared to information transfer was found for the group without association  
224 with cognition. These results were only observed in the left inferior temporal region. These  
225 results could indicate inefficient connectivity in these individuals (i.e., synchronized couplings  
226 with little to no information exchange). The observation of synchronized activity may therefore  
227 be related to cognitive function, but may also be dissociated from it. Thus, considering  
228 synchrony in association with information transfer seems important to clarify age-related  
229 changes and to distinguish efficient communications from inefficient/maladaptive network  
230 couplings. These communications are highly dependent on the integrity of the underlying  
231 structural network, and investigating the respective contribution of structure and function  
232 through a multiplex network could also allow distinguishing these functional connectivity  
233 patterns in pathologies. Indeed, an increase in neuronal synchrony can be observed in  
234 neurodegenerative pathologies and has been considered as maladaptive changes (for a review,  
235 see<sup>39</sup>). Further investigations of this distinction could lead to the identification of new markers  
236 of subsequent decline and progression of neurodegenerative pathologies.

237 Several methodological considerations should be discussed regarding the reported results. First,  
238 the study of resting-state activity partly limits the direct investigation of the neural bases of  
239 cognitive processes, as it might be less directly associated with cognitive functioning than task-  
240 related activity<sup>40</sup>. Second, the analysis of layer contributions only showed results for the left  
241 inferior temporal region, which does not allow us to generalize our interpretations to the entire  
242 brain. Thus, the pattern of layer contributions may be different in other regions and frequency  
243 bands<sup>2</sup>, although the reported changes were central in the context of healthy aging. Longitudinal  
244 studies could further validate our interpretations and improve our knowledge of other brain  
245 regions.

246 Several questions remain about the association between brain structure and function<sup>6,2</sup>. Indeed,  
247 this relationship undergoes crucial changes throughout the lifespan, as well as following several  
248 pathologies. The structure-function coupling also appears to fluctuate both over time and  
249 regionally. Although structural changes appear to drive changes in coupling between regions,  
250 brain functions are not solely determined from brain structure. Decreased integrity impacts  
251 neuronal synchrony and information exchange, and these changes are distinctly associated with  
252 cognitive performance in individuals. Here, we defined multiplex structure-function models in  
253 the context of healthy brain aging to better understand the heterogeneity of these changes across  
254 individuals (see **Figure 5** for a schematic representation of this model). In particular, we show  
255 its impact on cognitive performance, which improves our knowledge on different theoretical  
256 models of aging such as concepts of cognitive maintenance<sup>7</sup> and compensation<sup>8</sup>. Maintenance  
257 would thus be characterized by an imbalance in the contribution of phase synchrony and transfer  
258 information: with a higher level of contribution from PLV than from TE. Moreover, the level  
259 of similarity of connectivity between brain structure and function would be very low. Cognitive  
260 decline would also be associated with an imbalance in the contribution of phase synchrony and  
261 transfer information. However, in contrast to maintenance, the level of similarity of  
262 connectivity between brain structure and function would be very high. Finally, Compensation  
263 would be characterized by a balance in the contribution of phase synchrony and transfer  
264 information. The level of similarity of connectivity between structure and brain function would  
265 be very low, in the same way as in the maintenance concept. Indeed, a dissociation of

266 connectivity pattern between structure and function has been associated with the preservation  
 267 of cognitive performance. Importantly, these individual markers were not found in unimodal  
 268 analyses. This new approach might yield a better understanding of the brain, which could be  
 269 useful in clinical applications to better understand certain pathologies such as  
 270 neurodegenerative diseases, and more generally to further our understanding of the link  
 271 between structure and function in the brain.

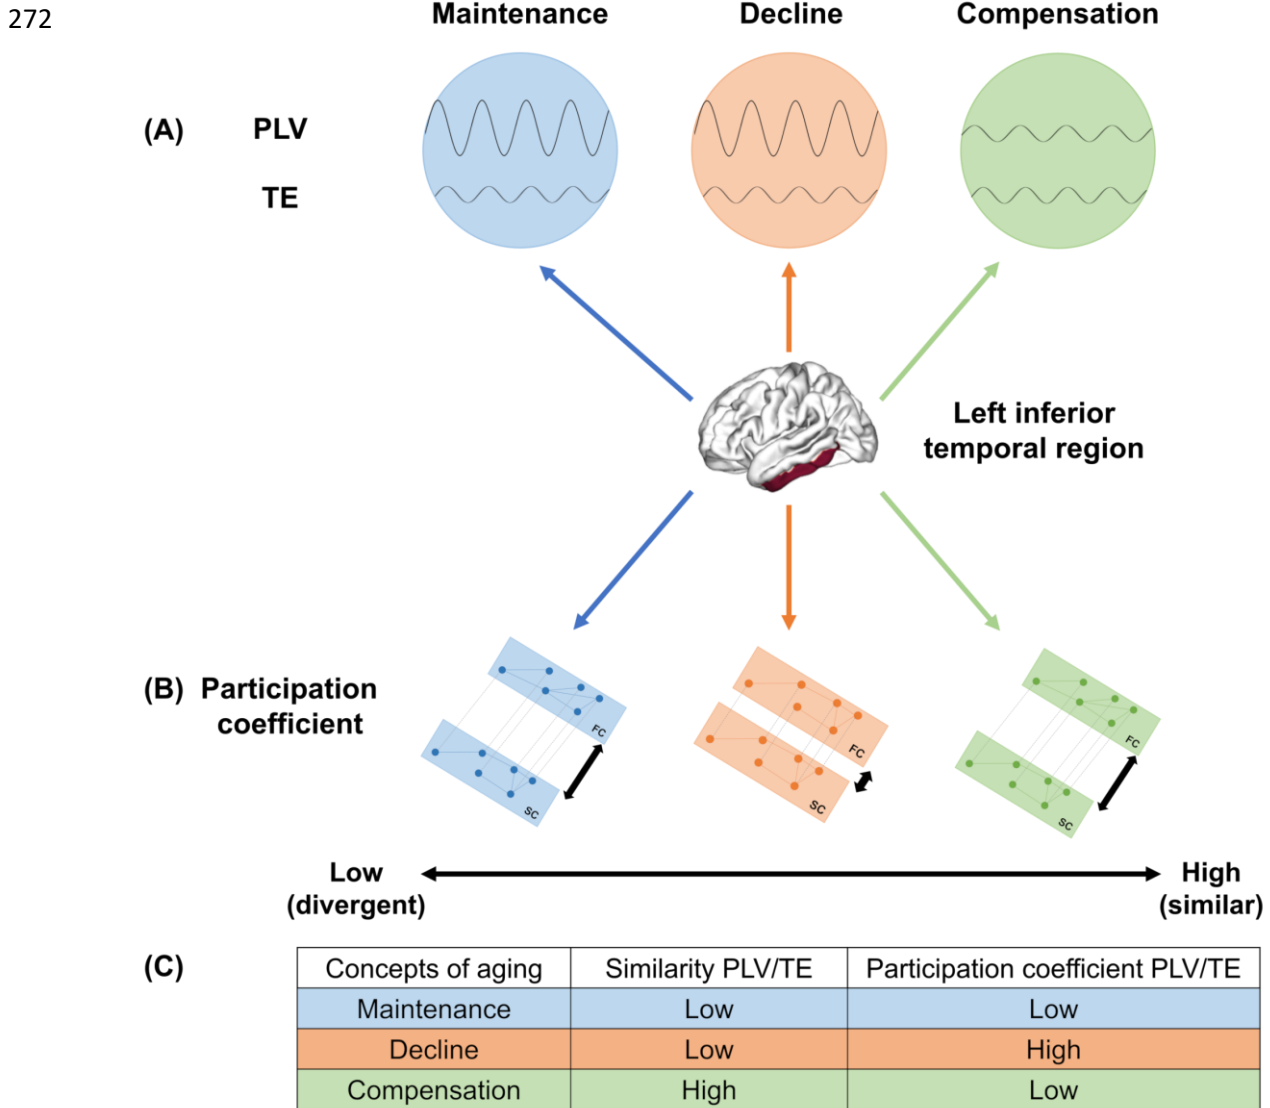

**Figure 5.** Schematic representation of the proposed model for the left inferior temporal region. (A) Level of contribution for PLV and TE. (B) Participation coefficient for PLV/DTI and TE/DTI multiplex network. (C) Summary of the relation between the level of similarity of contribution from PLV/TE, participation coefficient and concepts of aging. DTI: Diffusion Tensor Imaging, PLV: Phase Locking Value, TE: Transfer Entropy, FC: Functional Connectivity, SC: Structural Connectivity

## 273 **Materials and Methods**

### 274 Participants

275 All participants aged 20-30 years and 60-70 years were selected from the Cam-CAN  
276 database<sup>30,31</sup>, in line with demographic characteristics of individuals recruited in previous  
277 work<sup>41,18</sup>. Thus, we analysed data from 46 young (29 women and 17 men; aged 22-29 years)  
278 and 46 older healthy adults (29 women and 17 men; aged 60-69 years) (**Table 1**). All  
279 participants were right-handed, showed normal cognitive functioning<sup>42</sup> (Montreal Cognitive  
280 Assessment (MoCA) score >26), and no neurological or psychiatric conditions.

281 **Table 1. Demographics and scores for both groups younger and older participants**

282

| Variables                 | Young adults           | Older adults           | p-value      |
|---------------------------|------------------------|------------------------|--------------|
| Number of participants    | 46                     | 46                     | 1.000        |
| Number of women           | 29                     | 29                     | 1.000        |
| Age                       | 26.5 (2.01)            | 64.5 (2.85)            | <b>0.001</b> |
| <b>Years of education</b> | <b>22.2 (2.873)</b>    | <b>19.1 (3.262)</b>    | <b>0.001</b> |
| <b>MMSE</b>               | <b>29.5 (0.863)</b>    | <b>28.9 (1.173)</b>    | <b>0.013</b> |
| <b>VSTM</b>               | <b>0.5 (0.088)</b>     | <b>0.4 (0.069)</b>     | <b>0.001</b> |
| <b>Cattell</b>            | <b>37.8 (3.628)</b>    | <b>30.5 (6.285)</b>    | <b>0.001</b> |
| <b>Hotel_Num_rows</b>     | <b>4.7 (0.585)</b>     | <b>4.3 (1.008)</b>     | <b>0.018</b> |
| <b>Hotel_Time</b>         | <b>227.7 (119.796)</b> | <b>326.9 (194.305)</b> | <b>0.005</b> |

**Table 1.** Demographics and scores for both groups younger and older participants. MMSE: Mini-Mental State Evaluation; VSTM: Visual Short-Term Memory; Hotel\_num\_rows: corresponding to the number of rows performed by the participant; Hotel\_Time: corresponding to the time used to performed all rows by the participant. Differences between the two groups were calculated using t-test.

### 283 Behavioural measures

284 A detailed description of behavioural measures can be found in supplementary materials (see  
285 also Refs. <sup>30,31</sup>). Cognitive performance was assessed with the Mini-Mental State Evaluation<sup>43</sup>  
286 (MMSE) as a measure of general cognitive functioning, the Visual Short-Term Memory<sup>44</sup>  
287 (VSTM) as a test of short-term memory and working-memory maintenance, the Cattell test<sup>45</sup>  
288 measuring reasoning ability, and the Hotel Test<sup>46</sup> assessing executive functions (notably  
289 planning abilities). Despite significant differences between the two groups, all participants had  
290 normal cognitive function. These variables were added as covariates in statistical analyses.

### 291 MEG, structural MRI and DTI data acquisition

292 Resting MEG activity was measured for 10 minutes (sampling rate: 1kHz, bandpass filter: 0.03-  
293 330 Hz) with a 306-channel MEG system. Participants' 3D-T1 MRI images were acquired on a  
294 32-channel 3T MRI scanner. The following parameters were used: repetition time = 2250 ms;  
295 echo time = 2.99 ms; inversion time = 900 ms; flip angle = 9 degrees; field of view = 256 mm

296 x 240 mm x 192 mm; voxel size = 2 mm isotropic; GRAPPA acceleration factor = 2; acquisition  
297 time = 4 minutes and 32 seconds. DTI data were obtained with the following parameters:  
298 repetition time = 9100 ms; echo time = 104 ms; inversion time = 900 ms; field of view = 192  
299 mm x 192 mm; 66 axial slices; voxel size = 2 mm isotropic; B0 = 0.1000/2000s/mm<sup>2</sup>;  
300 acquisition time = 10 minutes and 2 seconds, readout time 0.0684 (echo spacing = 0.72ms, EPI  
301 factor = 96). See <https://camcan-archive.mrc-cbu.cam.ac.uk/dataaccess/> for more information.

### 302 MEG data pre-processing

303 The Elekta Neuromag MaxFilter 2.2 has been applied to MEG data (temporal signal space  
304 separation (tSSS): 0.98 correlation, 10s window; bad channel correction: ON; motion  
305 correction: OFF; 50Hz+harmonics (mains) notch). Afterwards, artifact rejection, filtering (0.3-  
306 100 Hz bandpass), temporal segmentation into epochs, averaging and source estimation were  
307 performed using Brainstorm<sup>47</sup>. In addition, physiological artefacts (e.g., blinks, saccades) were  
308 identified and removed using spatial space projection of the signal. In order to improve the  
309 accuracy of the source reconstruction, the FreeSurfer<sup>48</sup> software was used to generate cortical  
310 surfaces and automatically segment them from the cortical structures from each participant's  
311 T1-weighted anatomical MRI. The advanced MEG model was obtained from a symmetric  
312 boundary element method (BEM model<sup>49</sup>; OpenMEEG<sup>50</sup>), fitted to the spatial positions of each  
313 sensor<sup>51</sup>. A cortically constrained sLORETA procedure was applied to estimate the cortical  
314 origin of the scalp MEG signals. The estimated sources were then smoothed and projected into  
315 standard space (i.e., ICBM152 template) for comparisons between groups and individuals,  
316 while accounting for differences in anatomy (i.e., gray matter). This procedure was applied for  
317 the entire recording duration.

### 318 Connectivity analyses

319 Phase-locking value analyses<sup>52</sup> (PLV) were used to determine the functional synchrony  
320 between regions of interest. PLV estimates the variability of phase differences between two  
321 regions over time. If the phase difference varies little, the PLV is close to 1 (this corresponds  
322 to high synchronisation between the regions), while the low association of phase difference  
323 across regions is indicated by a PLV value close to zero. To ensure PLV results did not reflect  
324 volume conduction artefacts, additional control analyses were conducted using phase lag index  
325 (weighted PLI analyses). Because PLV is an undirected measure of functional connectivity, and  
326 to investigate brain dynamics with complementary metrics, analyses of transfer entropy (TE)  
327 have also been conducted. TE measures how a signal can predict subsequent changes in another  
328 signal<sup>53</sup>. It thus provides a directed measure of a coupling's strength. If there is no coupling  
329 between regions, then TE is close to 0, while TE is close to 1 if there is a strong coupling  
330 between two regions.

331 The range of each frequency band was based on the frequency of the individually observed  
332 alpha peak frequency (IAF), measured as the average of peaks detected from both  
333 occipitoparietal magnetometers and gradiometers. In line with previous work<sup>54</sup> the following  
334 frequency bands were considered: Delta (IAF-8/IAF-6), Theta (IAF-6/IAF-2), Alpha (IAF-  
335 2/IAF+2), Beta (IAF+2/IAF+14), Gamma (IAF+15/IAF+80). To reduce the dimensionality of  
336 the data, the first component of the principal component analysis (PCA) decomposition of the  
337 time course of activation in each of the 68 regions of interest (ROI) from the Desikan-Killiany  
338 brain atlas. The first component, rather than the average activity, was chosen to reduce signal  
339 leakage<sup>55</sup>.

### 340 DTI data pre-processing

341 Pre-processing of the diffusion data was performed using ExploreDTI<sup>56</sup> and included the  
342 following steps: (a) images were corrected for eddy current distortions and participant motion;  
343 (b) a non-linear least squares method was applied for diffusion tensor estimation, and (c)  
344 deterministic DTI tractography was applied using the following parameters: uniform resolution  
345 of 2 mm, fractional anisotropy (FA) threshold of 0.2 (limit: 1), angle threshold of 45°, and fibre  
346 length range of 50 to 500 mm. The network analysis tools in ExploreDTI were used to quantify  
347 the FA value of the fibres connecting the regions of the Desikan atlas, to obtain similar matrices  
348 to MEG data, using Freesurfer's individual cortical parcellation.

### 349 Multiplex Network construction and measures

350 Using BRAPH<sup>57</sup> software (<http://braph.org/>), a multiplex network was defined for each subject,  
351 with two layers: one “structural” layer with DTI tract FA data, and one “functional” layer with  
352 PLV or TE MEG data (in this study, a simplification of TE was used to determine whether a  
353 region was a receiver or sender). TE analyses were performed on each region and distinguished  
354 coupling directed from the network towards a given region (i.e., the inward direction), or from  
355 a given region towards the rest of the network (i.e., the outward direction). In each layer, brain  
356 regions from the Desikan-Killiany atlas<sup>58</sup> are represented by nodes connected by edges (see a  
357 method's summary in **Figure 1**). A binary multiplex matrix was calculated from the individual  
358 matrices of DTI and MEG data of each participant. Auto-correlations between regions were  
359 excluded from the analyses.

360 To evaluate across-layer integration, the multiplex participation coefficient<sup>59</sup> was investigated,  
361 allowing the quantification of the connectivity similarity of a node across the different layers.

362 The multiplex participation coefficient of a node  $i$  is defined as<sup>59</sup>:  $p_i = \frac{M}{M-1} \left[ 1 - \sum_{\alpha=1}^M \left( \frac{k_i^{[\alpha]}}{o_i} \right)^2 \right]$

363 where  $M$  is the number of layers,  $k_i^{[\alpha]}$  the degree of node  $i$  at the  $\alpha$ -th layer and  $o_i$  is the  
364 overlapping degree of node  $i$ ,  $o_i = \sum_{\alpha} k_i^{[\alpha]}$ . This coefficient measures how similar the  
365 connectivity patterns are in both layers of the multiplex network. Values range between 0 and  
366 1. In particular, value of 1 means that the node makes the exact connections in both layers,  
367 while a value of 0 means that the nodes connections in both layers are different from each other.  
368 A large participation value indicates that the node may be central or a hub. To determine which  
369 layer is driving the observed results, the degree (i.e., number of connections of each layer of  
370 the multiplex network for a given region) was also calculated for each group as:  $d^{[\alpha]} =$   
371  $\sum_{j=1}^N a_{ij}^{[\alpha]}$ ; where  $a_{ij}^{[\alpha]}$  is the link between node  $i$  and  $j$  in layer  $\alpha$ .

### 372 Statistical tests

373 To assess differences between age groups in multiplex participation for different brain regions,  
374 t-tests were applied using the Jamovi software (<https://www.jamovi.org/>; version 1.6.23).  
375 Regression analyses were performed in the older adults' group to assess whether the level of  
376 participation coefficient for a region was associated with cognitive performance. Afterwards,  
377 participants were grouped according to the level of participation coefficient for each region.  
378 Two subgroups were then formed: one corresponding to individuals with a high participation  
379 coefficient called "High participant group" and another with a low participation coefficient  
380 called "Low participant group". The median individuals (four from each group) were removed  
381 from subgroup analyses to reduce median split bias. As a result, each subgroup was composed  
382 of 19 individuals. Subgroups were also found in young adults but due to the large variability in  
383 young individuals, were considered as a single group. T-tests were also performed to determine

384 differences between subgroups. Original degrees of freedom and corrected p-values are  
385 reported. Results were FDR corrected for multiple comparisons<sup>60</sup>.

386



387 **Acknowledgements**

388 This research did not receive any specific grant from funding agencies in the public,  
389 commercial, or not-for-profit sectors.

390

391 **Author Contributions**

392 **G.Jauny**: Investigation, Analysis, Writing; **M.Mijalkov**: Methodology, Software, Review;  
393 **A.Canal-Garcia**: Methodology, Software, Review; **G.Volpe**: Methodology, Software,  
394 Review; **J.B.Pereira**: Methodology, Software, Review; **F.Eustache**: Supervision, Review;  
395 **T.Hinault**: Conceptualization, Methodology, Supervision, Review.

396 **References**

- 397 1. Buzsáki, G. *Rhythms of the Brain*. (Oxford University Press, 2006).  
398 doi:10.1093/acprof:oso/9780195301069.001.0001.
- 399 2. Liu, Z.-Q. *et al.* Time-resolved structure-function coupling in brain networks. *Commun.*  
400 *Biol.* **5**, 1–10 (2022).
- 401 3. Park, H.-J. & Friston, K. Structural and functional brain networks: from connections to  
402 cognition. *Science* **342**, 1238411 (2013).
- 403 4. Bullmore, E. & Sporns, O. Complex brain networks: graph theoretical analysis of structural  
404 and functional systems. *Nat. Rev. Neurosci.* **10**, 186–198 (2009).
- 405 5. Honey, C. J. *et al.* Predicting human resting-state functional connectivity from structural  
406 connectivity. *Proc. Natl. Acad. Sci.* **106**, 2035–2040 (2009).
- 407 6. Suárez, L. E., Markello, R. D., Betzel, R. F. & Misic, B. Linking Structure and Function in  
408 Macroscale Brain Networks. *Trends Cogn. Sci.* **24**, 302–315 (2020).
- 409 7. Nyberg, L., Lövdén, M., Riklund, K., Lindenberger, U. & Bäckman, L. Memory aging and  
410 brain maintenance. *Trends Cogn. Sci.* **16**, 292–305 (2012).
- 411 8. Cabeza, R. *et al.* Maintenance, reserve and compensation: the cognitive neuroscience of  
412 healthy ageing. *Nat. Rev. Neurosci.* **2018 1911** **19**, 701–710 (2018).
- 413 9. Uddin, L. Q., Supekar, K. S., Ryali, S. & Menon, V. Dynamic reconfiguration of structural  
414 and functional connectivity across core neurocognitive brain networks with development.  
415 *J. Neurosci. Off. J. Soc. Neurosci.* **31**, 18578–18589 (2011).
- 416 10. Baum, G. L. *et al.* Development of structure–function coupling in human brain  
417 networks during youth. *Proc. Natl. Acad. Sci.* **117**, 771–778 (2020).
- 418 11. Medaglia, J. D. *et al.* Functional alignment with anatomical networks is associated  
419 with cognitive flexibility. *Nat. Hum. Behav.* **2**, 156–164 (2018).
- 420 12. Burzynska, A. Z. *et al.* White Matter Integrity Supports BOLD Signal Variability and  
421 Cognitive Performance in the Aging Human Brain. *PLOS ONE* **10**, e0120315 (2015).

- 422 13. Webb, C. E., Rodrigue, K. M., Hoagey, D. A., Foster, C. M. & Kennedy, K. M.  
423 Contributions of White Matter Connectivity and BOLD Modulation to Cognitive Aging: A  
424 Lifespan Structure-Function Association Study. *Cereb. Cortex* **30**, 1649–1661 (2020).
- 425 14. Hinault, T., Larcher, K., Bherer, L., Courtney, S. M. & Dagher, A. Age-related  
426 differences in the structural and effective connectivity of cognitive control: a combined  
427 fMRI and DTI study of mental arithmetic. *Neurobiol. Aging* **82**, 30–39 (2019).
- 428 15. Uddin, L. Q. Bring the Noise: Reconceptualizing Spontaneous Neural Activity. *Trends*  
429 *Cogn. Sci.* **24**, 734–746 (2020).
- 430 16. Untergehrer, G., Jordan, D., Kochs, E. F., Ilg, R. & Schneider, G. Fronto-Parietal  
431 Connectivity Is a Non-Static Phenomenon with Characteristic Changes during  
432 Unconsciousness. *PLOS ONE* **9**, e87498 (2014).
- 433 17. Deslauriers-Gauthier, S. *et al.* White matter information flow mapping from diffusion  
434 MRI and EEG. *NeuroImage* **201**, 116017 (2019).
- 435 18. Hinault, T., Kraut, M., Bakker, A., Dagher, A. & Courtney, S. M. Disrupted neural  
436 synchrony mediates the relationship between white matter integrity and cognitive  
437 performance in older adults. *Cereb. Cortex* **30**, 5570–5582 (2020).
- 438 19. Hinault, T. *et al.* Age-related differences in network structure and dynamic synchrony  
439 of cognitive control. *NeuroImage* **236**, 118070 (2021).
- 440 20. Vaiana, M. & Muldoon, S. F. Multilayer Brain Networks. *J. Nonlinear Sci.* **30**, 2147–  
441 2169 (2020).
- 442 21. Battiston, F., Guillon, J., Chavez, M., Latora, V. & De Vico Fallani, F. Multiplex  
443 core–periphery organization of the human connectome. *J. R. Soc. Interface* **15**, 20180514  
444 (2018).
- 445 22. Brookes, M. J. *et al.* A multi-layer network approach to MEG connectivity analysis.  
446 *NeuroImage* **132**, 425–438 (2016).

- 447 23. Canal-Garcia, A. *et al.* Multiplex connectome changes across the alzheimer's disease  
448 spectrum using gray matter and amyloid data. *Cereb. Cortex* **32**, 3501–3515 (2022).
- 449 24. Guillon, J. *et al.* Loss of brain inter-frequency hubs in Alzheimer's disease. *Sci. Rep.*  
450 **7**, 10879 (2017).
- 451 25. Battiston, F., Nicosia, V., Chavez, M. & Latora, V. Multilayer motif analysis of brain  
452 networks. *Chaos Interdiscip. J. Nonlinear Sci.* **27**, 047404 (2017).
- 453 26. Courtney, S. M. & Hinault, T. When the time is right: Temporal dynamics of brain  
454 activity in healthy aging and dementia. *Prog. Neurobiol.* **203**, 102076 (2021).
- 455 27. Tóth, B. *et al.* Frontal midline theta connectivity is related to efficiency of WM  
456 maintenance and is affected by aging. *Neurobiol. Learn. Mem.* **114**, 58–69 (2014).
- 457 28. Ariza, P. *et al.* Evaluating the effect of aging on interference resolution with time-  
458 varying complex networks analysis. *Front. Hum. Neurosci.* **9**, (2015).
- 459 29. Park, D. C. & Reuter-Lorenz, P. The Adaptive Brain: Aging and Neurocognitive  
460 Scaffolding. *Annu. Rev. Psychol.* **60**, 173 (2009).
- 461 30. Shafto, M. A. *et al.* The Cambridge Centre for Ageing and Neuroscience (Cam-CAN)  
462 study protocol: a cross-sectional, lifespan, multidisciplinary examination of healthy  
463 cognitive ageing. *BMC Neurol.* **14**, (2014).
- 464 31. Taylor, J. R. *et al.* The Cambridge Centre for Ageing and Neuroscience (Cam-CAN)  
465 data repository: Structural and functional MRI, MEG, and cognitive data from a cross-  
466 sectional adult lifespan sample. *NeuroImage* **144**, 262–269 (2017).
- 467 32. Hagmann, P. *et al.* Mapping the Structural Core of Human Cerebral Cortex. *PLOS*  
468 *Biol.* **6**, e159 (2008).
- 469 33. Andrews-Hanna, J. R., Smallwood, J. & Spreng, R. N. The default network and self-  
470 generated thought: component processes, dynamic control, and clinical relevance. *Ann. N.*  
471 *Y. Acad. Sci.* **1316**, 29–52 (2014).

- 472 34. Andrews-Hanna, J. R. *et al.* Disruption of Large-Scale Brain Systems in Advanced  
473 Aging. *Neuron* **56**, 924–935 (2007).
- 474 35. Bonnefond, M., Kastner, S. & Jensen, O. Communication between Brain Areas Based  
475 on Nested Oscillations. *eNeuro* **4**, ENEURO.0153-16.2017 (2017).
- 476 36. Sadaghiani, S. & Kleinschmidt, A. Brain Networks and  $\alpha$ -Oscillations: Structural and  
477 Functional Foundations of Cognitive Control. *Trends Cogn. Sci.* **20**, 805–817 (2016).
- 478 37. Anderson, B. A., Folk, C. L. & Courtney, S. M. Neural mechanisms of goal-  
479 contingent task disengagement: Response-irrelevant stimuli activate the default mode  
480 network. *Cortex* **81**, 221–230 (2016).
- 481 38. Poza, J. *et al.* Phase-amplitude coupling analysis of spontaneous EEG activity in  
482 Alzheimer’s disease. *Annu. Int. Conf. IEEE Eng. Med. Biol. Soc. IEEE Eng. Med. Biol.*  
483 *Soc. Annu. Int. Conf.* **2017**, 2259–2262 (2017).
- 484 39. Jauny, G., Eustache, F. & Hinault, T. T. M/EEG Dynamics Underlying Reserve,  
485 Resilience, and Maintenance in Aging: A Review. *Front. Psychol.* **13**, (2022).
- 486 40. Grigg, O. & Grady, C. L. Task-Related Effects on the Temporal and Spatial Dynamics  
487 of Resting-State Functional Connectivity in the Default Network. *PLOS ONE* **5**, e13311  
488 (2010).
- 489 41. Coquelet, N. *et al.* The electrophysiological connectome is maintained in healthy  
490 elders: A power envelope correlation MEG study. *Sci. Rep.* **7**, 1–10 (2017).
- 491 42. Nasreddine, Z. S. *et al.* The Montreal Cognitive Assessment, MoCA: A Brief  
492 Screening Tool For Mild Cognitive Impairment. *J. Am. Geriatr. Soc.* **53**, 695–699 (2005).
- 493 43. Folstein, M. F., Folstein, S. E. & McHugh, P. R. “Mini-mental state”: A practical  
494 method for grading the cognitive state of patients for the clinician. *J. Psychiatr. Res.* **12**,  
495 189–198 (1975).

- 496 44. Vogel, E. K., Woodman, G. F. & Luck, S. J. Storage of features, conjunctions, and  
497 objects in visual working memory. *J. Exp. Psychol. Hum. Percept. Perform.* **27**, 92–114  
498 (2001).
- 499 45. Horn, J. L. & Cattell, R. B. Refinement and test of the theory of fluid and crystallized  
500 general intelligences. *J. Educ. Psychol.* **57**, 253–270 (1966).
- 501 46. Shallice, T. & Burgess, P. W. DEFICITS IN STRATEGY APPLICATION  
502 FOLLOWING FRONTAL LOBE DAMAGE IN MAN. *Brain* **114**, 727–741 (1991).
- 503 47. Tadel, F., Baillet, S., Mosher, J. C., Pantazis, D. & Leahy, R. M. Brainstorm: A user-  
504 friendly application for MEG/EEG analysis. *Comput. Intell. Neurosci.* **2011**, (2011).
- 505 48. Fischl, B. FreeSurfer. *NeuroImage* **62**, 774–781 (2012).
- 506 49. Kybic, J. *et al.* A common formalism for the Integral formulations of the forward EEG  
507 problem. *IEEE Trans. Med. Imaging* **24**, 12–28 (2005).
- 508 50. Gramfort, A., Papadopoulos, T., Olivi, E. & Clerc, M. OpenMEEG: opensource  
509 software for quasistatic bioelectromagnetics. *Biomed. Eng. OnLine* **9**, 45 (2010).
- 510 51. Huang, M. X., Mosher, J. C. & Leahy, R. M. A sensor-weighted overlapping-sphere  
511 head model and exhaustive head model comparison for MEG. *Phys. Med. Biol.* **44**, 423  
512 (1999).
- 513 52. Lachaux, J.-P., Rodriguez, E., Martinerie, J. & Varela, F. J. Measuring Phase  
514 Synchrony in Brain Signals. *Hum Brain Mapp.* **8**, 194–208 (1999).
- 515 53. Ursino, M., Ricci, G. & Magosso, E. Transfer Entropy as a Measure of Brain  
516 Connectivity: A Critical Analysis With the Help of Neural Mass Models. *Front. Comput.*  
517 *Neurosci.* **14**, 45 (2020).
- 518 54. Toppi, J. *et al.* Different Topological Properties of EEG-Derived Networks Describe  
519 Working Memory Phases as Revealed by Graph Theoretical Analysis. *Front. Hum.*  
520 *Neurosci.* **11**, 637 (2017).

- 521 55. Sato, M., Yamashita, O., Sato, M. aki & Miyawaki, Y. Information spreading by a  
522 combination of MEG source estimation and multivariate pattern classification. *PLOS ONE*  
523 **13**, e0198806 (2018).
- 524 56. Leemans, A., Jeurissen, B., Sijbers, J. & Jones, D. K. ExploreDTI: a graphical toolbox  
525 for processing, analyzing, and visualizing diffusion MR data.
- 526 57. Mijalkov, M. *et al.* BRAPH: A graph theory software for the analysis of brain  
527 connectivity. *PLOS ONE* **12**, e0178798 (2017).
- 528 58. Desikan, R. S. *et al.* An automated labeling system for subdividing the human cerebral  
529 cortex on MRI scans into gyral based regions of interest. *NeuroImage* **31**, 968–980 (2006).
- 530 59. Battiston, F., Nicosia, V. & Latora, V. Structural measures for multiplex networks.  
531 *Phys. Rev. E* **89**, 032804 (2014).
- 532 60. Benjamini, Y. & Hochberg, Y. Controlling the False Discovery Rate: a Practical and  
533 Powerful Approach to Multiple Testing. *J R Stat. Soc B* **57**, 289–300 (1995).
- 534
- 535
